# Supplementary material for: Synthetic DNA Vaccines Adjuvanted with pIL-33 Drive Liver-Localized T Cells and Provide Protection from Plasmodium Challenge in a Mouse Model
Source: MDPI journal article supplement (doi:10.3390/vaccines8010021), 2020-01-10
Supplement: s1 [file s1]

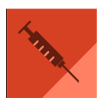

Table S1. Protection from blood stage parasitemia.

| Construct                   | Immunization Intervals in Weeks | IV Challenge dose (days after Last Immunization) | Protected <sup>+</sup> /Challenged | Average BS Pre-Patency in Days after IV Challenge for <u>Infected Mice</u> |
|-----------------------------|---------------------------------|--------------------------------------------------|------------------------------------|----------------------------------------------------------------------------|
| EXP1_PFN                    | 0, 3, 6, 9                      | 250 (63)                                         | 6/8                                | d. 6 (for two mice)                                                        |
| <b>EXP1_PFN + IL-33</b>     | <b>0, 3, 6, 9</b>               | <b>250 (63)</b>                                  | <b>7/7</b>                         | -                                                                          |
| EXP2 + ICP                  | 0, 3, 6, 9                      | 250 (63)                                         | 5/7                                | d. 5.5 (for two mice)                                                      |
| <b>EXP2 + ICP + IL-33</b>   | <b>0, 3, 6, 9</b>               | <b>250 (63)</b>                                  | <b>8/8</b>                         | -                                                                          |
| TMP21 + UIS3                | 0, 3, 6, 9                      | 250 (63)                                         | 7/8                                | d. 6 (for one mouse)                                                       |
| <b>TMP21 + UIS3 + IL-33</b> | <b>0, 3, 6, 9</b>               | <b>250 (63)</b>                                  | <b>8/8</b>                         | -                                                                          |
| all                         | 0, 3, 6, 9                      | 250 (63)                                         | 6/7                                | d. 6 (for one mouse)                                                       |
| <b>all + IL-33</b>          | <b>0, 3, 6, 9</b>               | <b>250 (63)</b>                                  | <b>7/7</b>                         | -                                                                          |
| pVax                        | 0, 3, 6, 9                      | 250 (63)                                         | 0/5                                | d. 4 (for all mice)                                                        |
| IL-33                       | 0, 3, 6, 9                      | 250 (63)                                         | 0/5                                | d. 4 (for all mice)                                                        |

+ Protection is defined as the complete absence of any BS parasites on daily blood smears for at least 10 days post challenge.
